# Supplementary material
Source: PubMed Central journal article supplement (PMC5544070)
Supplement: tpmd160570.SD1.pdf [file tpmd160570.SD1.pdf]

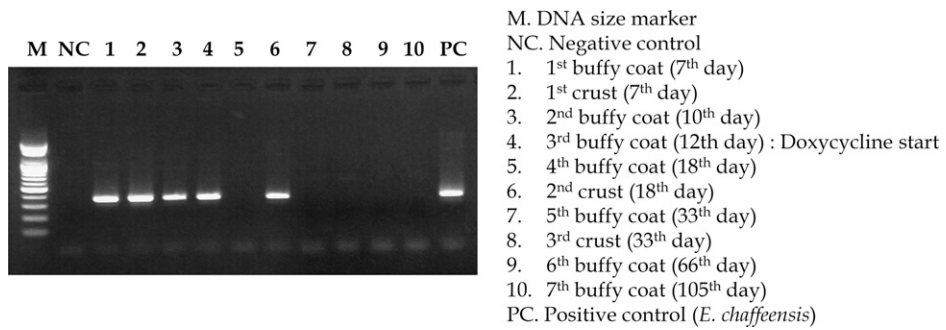

SUPPLEMENTAL FIGURE 1. Agarose gel electrophoresis of the polymerase chain reaction (PCR) products after GroEL heat-shock protein operon gene nested PCR using buffy coat and crust lesion specimens at each time point after the symptoms started.
